# Supplementary material for: Syntheses, structures and properties of a series of non-heme alkoxide-Fe(III) complexes of a benzimidazolyl-rich ligand as models for lipoxygenase
Source: Royal Society of Chemistry journal article supplement (doi:10.1039/c0dt01760d), 2011-01-01
Supplement: c0dt01760d.pdf [file c0dt01760d.pdf]

**Supporting information for**

**Syntheses, structures and properties of a series of non-heme  
alkoxide-Fe(III) complexes of a benzimidazolyl-rich ligand  
as models for lipoxygenase**

**Guiling Wu,<sup>a</sup> Fusheng Mei,<sup>a</sup> Qian Gao,<sup>a</sup> Fang Han,<sup>a</sup> Shemin Lan,<sup>a</sup> Jianming Zhang<sup>a</sup> and  
Dongfeng Li<sup>\*a,b</sup>**

<sup>a</sup> *Key Laboratory of Pesticide & Chemical Biology of Ministry of Education, College  
of Chemistry, Central China Normal University, Wuhan 430079, P. R. China. Fax:  
+86 27 67867232; E-mail: dfli@mail.ccnu.edu.cn*

<sup>b</sup> *State Key Laboratory of Coordination Chemistry, Nanjing University, Nanjing  
210093, P. R. China.*

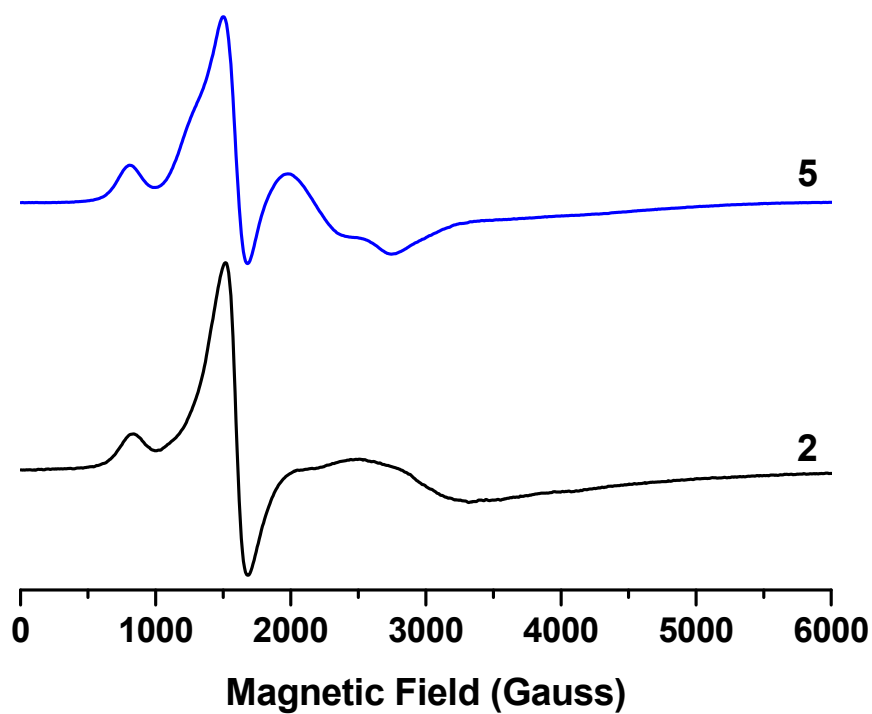

**Fig. S1.** X-band EPR spectra of complexes **2** and **5** in the polycrystalline state at 110 K ( $f = 9.482$  GHz).

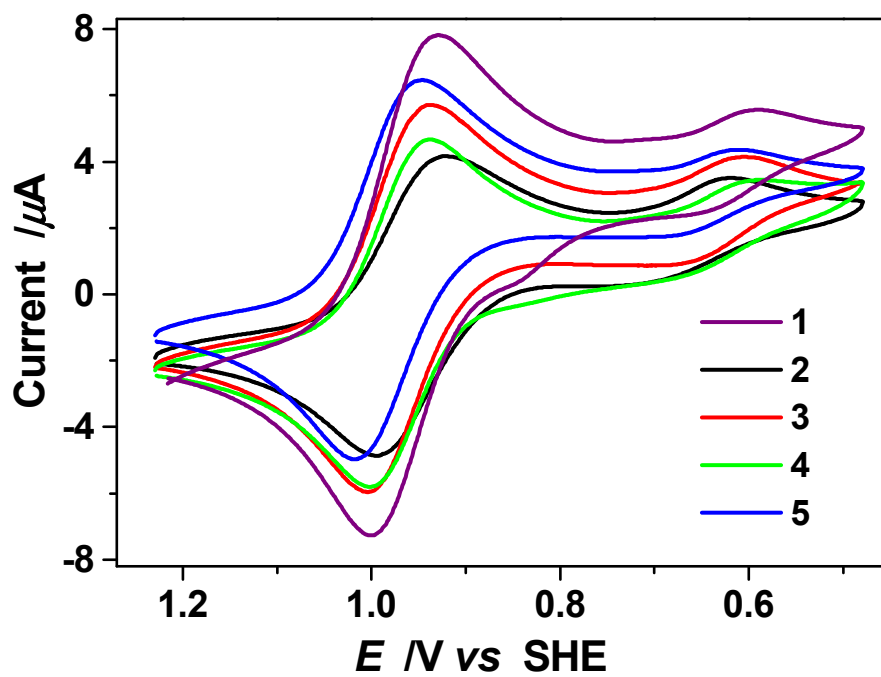

**Fig. S2** Cyclic voltammograms of complexes **1**, **2**, **3**, **4** and **5** in dry acetonitrile ( $c = 1.0$  mM) under dry Ar atmosphere with scan rate of 50 mV/s, 0.10 M TBAP as the supported electrolyte.

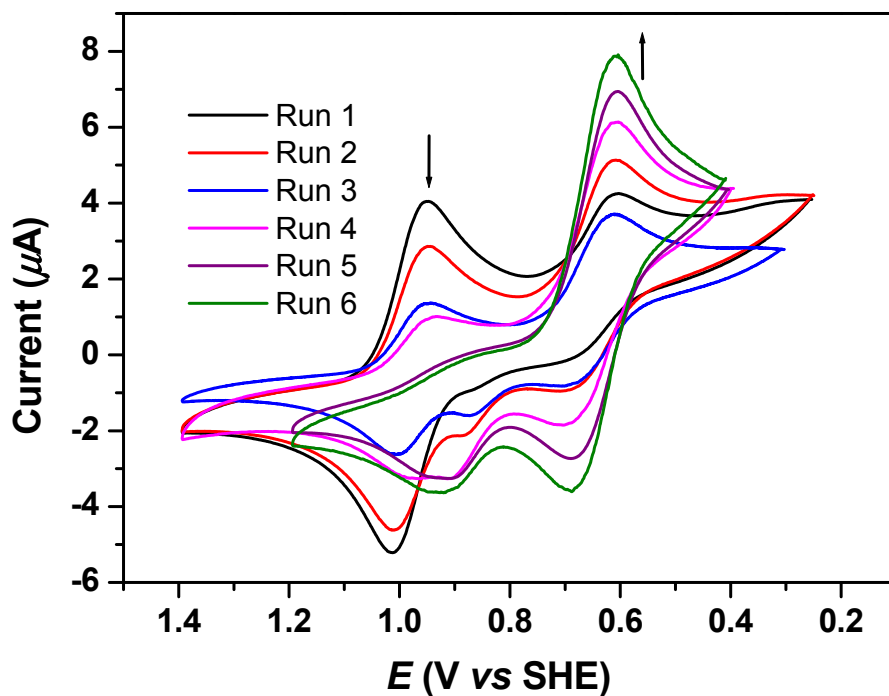

**Fig. S3** Cyclic voltammograms of complex **3** in dry acetonitrile ( $c = 1.0$  mM) under dry Ar atmosphere at room temperature with scan rate of 50 mV/s, 0.10 M TBAP as the supported electrolyte.

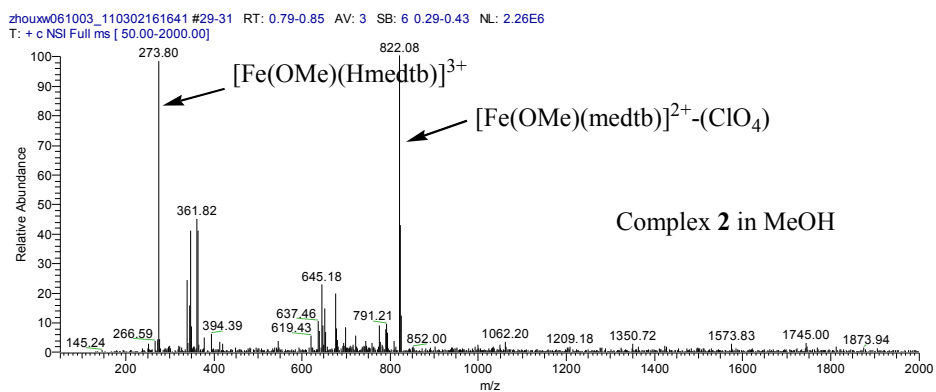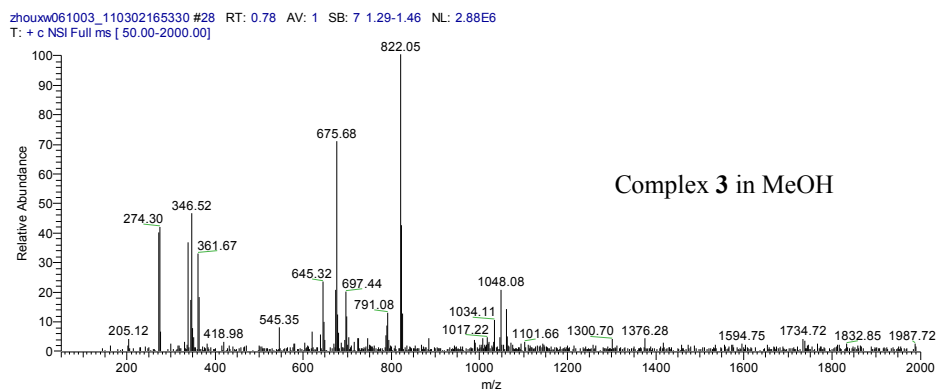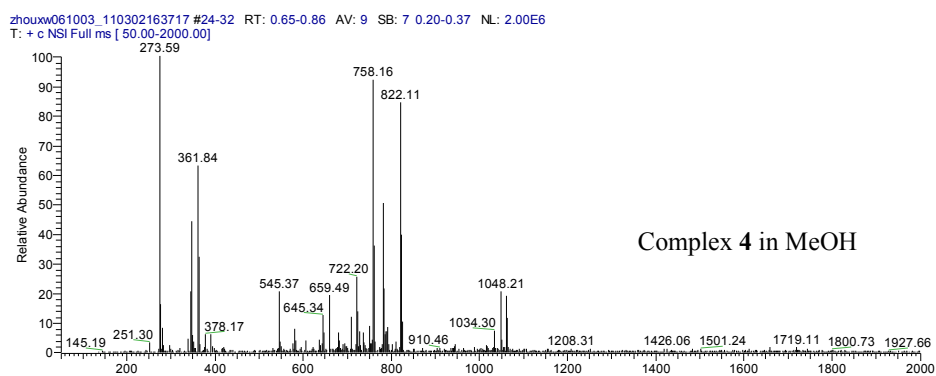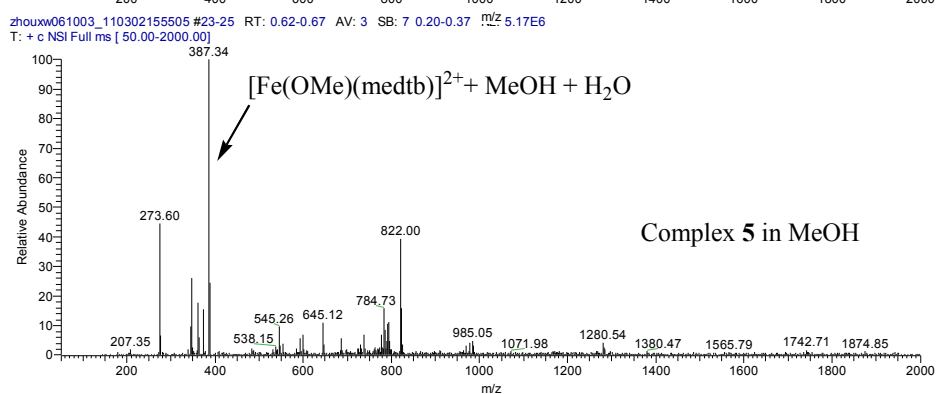

Fig. S4 ESI-MS spectra for complexes 2-5 with methanol as solvent.

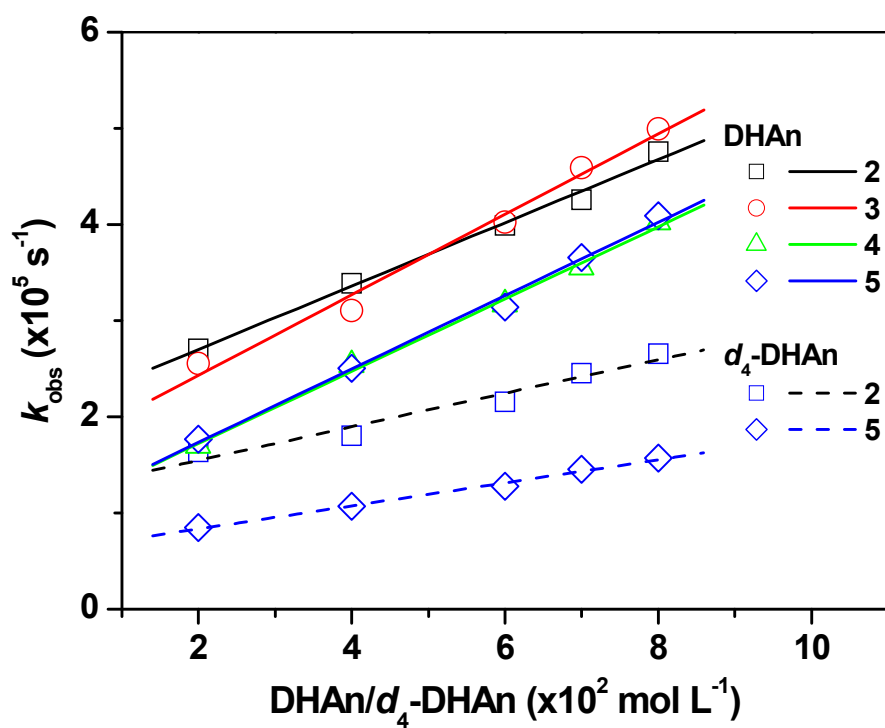

**Fig. S5** First-order rate constants for the reduction of complexes 2-5 in the presence of 9,10-dihydroanthracene (DHAn) or  $d_4$ -9,10-dihydroanthracene ( $d_4$ -DHAn) in MeOH for 2, EtOH for 3, *n*-PrOH for 4 and *n*-BuOH for 5 at 333 K, respectively.
